# Supplementary material for: Excited-state properties of organic semiconductor dyes as electrically pumped lasing candidates from new optimally tuned range-separated models
Source: Royal Society of Chemistry journal article supplement (doi:10.1039/d1cp05363a), 2022-01-01
Supplement: d1cp05363a1.pdf [file d1cp05363a1.pdf]

Supporting Information for the paper entitled:

**Excited-States Properties of Organic Semiconductor Dyes as Electrically Pumped  
Lasing Candidates from New Optimally Tuned Range-Separated Models**

Mojtaba Alipour\* and Samaneh Damiri

*Department of Chemistry, School of Science, Shiraz University, Shiraz 71946-84795, Iran*

\* **Corresponding Author.**

E-mail: malipour@shirazu.ac.ir.

Phone: +98 71 36137160.

Fax: +98 71 36460788.

---

*This file includes 11 tables (Tables S1-S11) and 2 figures (Figures S1 and S2).*

**Table S1.** Computed values (eV) of the emission energies of the systems under study using the proposed OT-RSHs based on different DFAs, *i.e.*, BLYP, PBE, and TPSS, for the  $\alpha = 0.0, \beta = 1.0$  combination. Also given in the table are the experimental data used as reference (Ref.). The corresponding statistical metrics are shown in boldface.

| Molecules   | Ref.              | BLYP        | PBE         | TPSS        |
|-------------|-------------------|-------------|-------------|-------------|
| BP3T        | 2.17 <sup>a</sup> | 2.44        | 2.47        | 2.48        |
| BSBCz       | 2.58 <sup>b</sup> | 2.85        | 2.87        | 2.90        |
| CzPVSBF     | 2.63 <sup>c</sup> | 2.79        | 2.80        | 2.83        |
| BPBFCz1     | 2.56 <sup>d</sup> | 2.99        | 3.00        | 3.03        |
| BPBFCz2     | 2.90 <sup>d</sup> | 3.07        | 3.08        | 3.11        |
| <b>MSD</b>  |                   | <b>0.26</b> | <b>0.28</b> | <b>0.30</b> |
| <b>MAD</b>  |                   | <b>0.26</b> | <b>0.28</b> | <b>0.30</b> |
| <b>RMSD</b> |                   | <b>0.28</b> | <b>0.29</b> | <b>0.32</b> |

<sup>a</sup> M. Ichikawa, K. Nakamura, M. Inoue, H. Mishima, T. Haritani, R. Hibino, T. Koyama and Y. Taniguchi, *Appl. Phys. Lett.*, 2005, **87**, 221113-1-221113-3.

<sup>b</sup> A. S. D. Sandanayaka, K. Yoshida, M. Inoue, C. Qin, K. Goushi, J.-C. Ribierre, T. Matsushima and C. Adachi, *Adv. Opt. Mater.* 2016, **4**, 834-839.

<sup>c</sup> H. Nakanotani, S. Akiyama, D. Ohnishi, M. Moriwake, M. Yahiro, T. Yoshihara, S. Tobita and C. Adachi, *Adv. Funct. Mater.* **2007**, *17*, 2328-2335.

<sup>d</sup> Y. Oyama, M. Mamada, A. Shukla, E. G. Moore, S.-C. Lo, E. B. Namdas and C. Adachi, *ACS Mater. Lett.* 2020, **2**, 161-167.

Note: How to obtain the experimental data for each organic semiconductor dye is briefly as follows: BP3T<sup>a</sup> (electroluminescence spectrum of a single crystal, where vibronic progression peak was used to determine the maximum wavelength); BSBCz<sup>b</sup> (emission spectrum measured from the laser device of neat films at different excitation intensities); CzPVSBF<sup>c</sup> (photoluminescence spectrum in neat film, corresponds to the amplified-spontaneous-emission (ASE) peak wavelength); BPBFCz1<sup>d</sup> and BPBFCz2<sup>d</sup> (photoluminescence spectra in neat films).

**Table S2.** Computed values (eV) of the emission energies of the systems under study using the proposed OT-RSHs based on different DFAs, *i.e.*, BLYP, PBE, and TPSS, for the  $\alpha = 0.1, \beta = 0.9$  combination. Also given in the table are the experimental data used as reference (Ref.). The corresponding statistical metrics are shown in boldface.

| Molecules   | Ref. | BLYP        | PBE         | TPSS        |
|-------------|------|-------------|-------------|-------------|
| BP3T        | 2.17 | 2.40        | 2.43        | 2.45        |
| BSBCz       | 2.58 | 2.72        | 2.75        | 2.78        |
| CzPVSBF     | 2.63 | 2.68        | 2.69        | 2.73        |
| BPBFCz1     | 2.56 | 2.94        | 2.96        | 2.99        |
| BPBFCz2     | 2.90 | 3.01        | 3.02        | 3.05        |
| <b>MSD</b>  |      | <b>0.18</b> | <b>0.20</b> | <b>0.23</b> |
| <b>MAD</b>  |      | <b>0.18</b> | <b>0.20</b> | <b>0.23</b> |
| <b>RMSD</b> |      | <b>0.22</b> | <b>0.23</b> | <b>0.26</b> |

**Table S3.** Computed values (eV) of the emission energies of the systems under study using the proposed OT-RSHs based on different DFAs, *i.e.*, BLYP, PBE, and TPSS, for the  $\alpha = 0.2, \beta = 0.8$  combination. Also given in the table are the experimental data used as reference (Ref.). The corresponding statistical metrics are shown in boldface.

| Molecules   | Ref. | BLYP        | PBE         | TPSS        |
|-------------|------|-------------|-------------|-------------|
| BP3T        | 2.17 | 2.35        | 2.38        | 2.40        |
| BSBCz       | 2.58 | 2.72        | 2.73        | 2.77        |
| CzPVSBF     | 2.63 | 2.61        | 2.62        | 2.66        |
| BPBFCz1     | 2.56 | 2.87        | 2.88        | 2.91        |
| BPBFCz2     | 2.90 | 2.93        | 2.95        | 2.98        |
| <b>MSD</b>  |      | <b>0.13</b> | <b>0.14</b> | <b>0.18</b> |
| <b>MAD</b>  |      | <b>0.14</b> | <b>0.15</b> | <b>0.18</b> |
| <b>RMSD</b> |      | <b>0.17</b> | <b>0.19</b> | <b>0.21</b> |

**Table S4.** Computed values (eV) of the emission energies of the systems under study using the proposed OT-RSHs based on different DFAs, *i.e.*, BLYP, PBE, and TPSS, for the  $\alpha = 0.3, \beta = 0.7$  combination. Also given in the table are the experimental data used as reference (Ref.). The corresponding statistical metrics are shown in boldface.

| Molecules   | Ref. | BLYP        | PBE         | TPSS        |
|-------------|------|-------------|-------------|-------------|
| BP3T        | 2.17 | 2.30        | 2.32        | 2.34        |
| BSBCz       | 2.58 | 2.64        | 2.65        | 2.69        |
| CzPVSBF     | 2.63 | 2.51        | 2.52        | 2.56        |
| BPBFCz1     | 2.56 | 2.75        | 2.76        | 2.80        |
| BPBFCz2     | 2.90 | 2.85        | 2.87        | 2.91        |
| <b>MSD</b>  |      | <b>0.04</b> | <b>0.06</b> | <b>0.09</b> |
| <b>MAD</b>  |      | <b>0.11</b> | <b>0.11</b> | <b>0.12</b> |
| <b>RMSD</b> |      | <b>0.12</b> | <b>0.13</b> | <b>0.14</b> |

**Table S5.** Computed values (eV) of the emission energies of the systems under study using the proposed OT-RSHs based on different DFAs, *i.e.*, BLYP, PBE, and TPSS, for the  $\alpha = 0.4, \beta = 0.6$  combination. Also given in the table are the experimental data used as reference (Ref.). The corresponding statistical metrics are shown in boldface.

| Molecules   | Ref. | BLYP         | PBE          | TPSS         |
|-------------|------|--------------|--------------|--------------|
| BP3T        | 2.17 | 2.22         | 2.24         | 2.26         |
| BSBCz       | 2.58 | 2.51         | 2.52         | 2.56         |
| CzPVSBF     | 2.63 | 2.37         | 2.38         | 2.43         |
| BPBFCz1     | 2.56 | 2.59         | 2.60         | 2.65         |
| BPBFCz2     | 2.90 | 2.73         | 2.74         | 2.79         |
| <b>MSD</b>  |      | <b>-0.08</b> | <b>-0.07</b> | <b>-0.03</b> |
| <b>MAD</b>  |      | <b>0.12</b>  | <b>0.12</b>  | <b>0.10</b>  |
| <b>RMSD</b> |      | <b>0.14</b>  | <b>0.14</b>  | <b>0.12</b>  |

**Table S6.** The computed values (eV) of the emission energies of the systems under study using the best proposed OT-RSHs in this work and 6-31+G(d) basis set. Also given in the table are the experimental data used as reference (Ref.). The corresponding statistical metrics are shown in boldface.

| Molecules   | Ref. | BLYP ( $\alpha = 0.3, \beta = 0.7$ ) | PBE ( $\alpha = 0.3, \beta = 0.7$ ) | TPSS ( $\alpha = 0.4, \beta = 0.6$ ) |
|-------------|------|--------------------------------------|-------------------------------------|--------------------------------------|
| BP3T        | 2.17 | 2.21                                 | 2.26                                | 2.20                                 |
| BSBCz       | 2.58 | 2.58                                 | 2.60                                | 2.51                                 |
| CzPVSBF     | 2.63 | 2.46                                 | 2.48                                | 2.39                                 |
| BPBFCz1     | 2.56 | 2.70                                 | 2.72                                | 2.62                                 |
| BPBFCz2     | 2.90 | 2.80                                 | 2.83                                | 2.75                                 |
| <b>MSD</b>  |      | <b>-0.02</b>                         | <b>0.01</b>                         | <b>-0.07</b>                         |
| <b>MAD</b>  |      | <b>0.09</b>                          | <b>0.10</b>                         | <b>0.11</b>                          |
| <b>RMSD</b> |      | <b>0.11</b>                          | <b>0.11</b>                         | <b>0.13</b>                          |

**Table S7.** The computed values (eV) of the emission energies of the systems under study using the best proposed OT-RSHs in this work and 6-311G(d,p) basis set. Also given in the table are the experimental data used as reference (Ref.). The corresponding statistical metrics are shown in boldface.

| Molecules   | Ref. | BLYP ( $\alpha = 0.3, \beta = 0.7$ ) | PBE ( $\alpha = 0.3, \beta = 0.7$ ) | TPSS ( $\alpha = 0.4, \beta = 0.6$ ) |
|-------------|------|--------------------------------------|-------------------------------------|--------------------------------------|
| BP3T        | 2.17 | 2.25                                 | 2.28                                | 2.23                                 |
| BSBCz       | 2.58 | 2.59                                 | 2.61                                | 2.52                                 |
| CzPVSBF     | 2.63 | 2.47                                 | 2.48                                | 2.40                                 |
| BPBFCz1     | 2.56 | 2.70                                 | 2.72                                | 2.61                                 |
| BPBFCz2     | 2.90 | 2.81                                 | 2.83                                | 2.75                                 |
| <b>MSD</b>  |      | <b>0.00</b>                          | <b>0.02</b>                         | <b>-0.07</b>                         |
| <b>MAD</b>  |      | <b>0.10</b>                          | <b>0.10</b>                         | <b>0.11</b>                          |
| <b>RMSD</b> |      | <b>0.11</b>                          | <b>0.11</b>                         | <b>0.13</b>                          |



**Table S8.** The computed values (eV) of the emission energies of the systems under study using the best proposed OT-RSHs in this work and 6-311++G(d,p) basis set. Also given in the table are the experimental data used as reference (Ref.). The corresponding statistical metrics are shown in boldface.

| Molecules   | Ref. | BLYP ( $\alpha = 0.3, \beta = 0.7$ ) | PBE ( $\alpha = 0.3, \beta = 0.7$ ) | TPSS ( $\alpha = 0.4, \beta = 0.6$ ) |
|-------------|------|--------------------------------------|-------------------------------------|--------------------------------------|
| BP3T        | 2.17 | 2.20                                 | 2.25                                | 2.19                                 |
| BSBCz       | 2.58 | 2.56                                 | 2.58                                | 2.50                                 |
| CzPVSBF     | 2.63 | 2.44                                 | 2.46                                | 2.38                                 |
| BPBFCz1     | 2.56 | 2.68                                 | 2.70                                | 2.60                                 |
| BPBFCz2     | 2.90 | 2.78                                 | 2.80                                | 2.73                                 |
| <b>MSD</b>  |      | <b>-0.04</b>                         | <b>-0.01</b>                        | <b>-0.09</b>                         |
| <b>MAD</b>  |      | <b>0.10</b>                          | <b>0.10</b>                         | <b>0.11</b>                          |
| <b>RMSD</b> |      | <b>0.11</b>                          | <b>0.11</b>                         | <b>0.14</b>                          |

**Table S9.** The computed values of the emission oscillator strengths of the systems under study using the best proposed OT-RSHs in this work.

| Molecule | BLYP ( $\alpha = 0.3, \beta = 0.7$ ) | PBE ( $\alpha = 0.3, \beta = 0.7$ ) | TPSS ( $\alpha = 0.4, \beta = 0.6$ ) |
|----------|--------------------------------------|-------------------------------------|--------------------------------------|
| BP3T     | 2.38                                 | 2.41                                | 2.45                                 |
| BSBCz    | 3.29                                 | 3.30                                | 3.15                                 |
| CzPVSBF  | 2.99                                 | 3.01                                | 2.83                                 |
| BPBFCz1  | 2.53                                 | 2.52                                | 2.26                                 |
| BPBFCz2  | 2.83                                 | 2.85                                | 2.74                                 |

**Table S10.** The computed values (eV) of the emission energies of the systems under study using the best proposed OT-RSHs-PCM in this work. Also given in the table are the experimental data used as reference (Ref.). The corresponding statistical metrics are shown in boldface.

| Molecules | Ref. | BLYP ( $\alpha = 0.3, \beta = 0.7$ ) | PBE ( $\alpha = 0.3, \beta = 0.7$ ) | TPSS ( $\alpha = 0.4, \beta = 0.6$ ) |
|-----------|------|--------------------------------------|-------------------------------------|--------------------------------------|
| BP3T      | 2.17 | 2.17                                 | 2.20                                | 2.14                                 |
| BSBCz     | 2.58 | 2.57                                 | 2.58                                | 2.49                                 |
| CzPVSBF   | 2.63 | 2.44                                 | 2.45                                | 2.36                                 |
| BPBFCz1   | 2.56 | 2.69                                 | 2.70                                | 2.61                                 |
| BPBFCz2   | 2.90 | 2.79                                 | 2.80                                | 2.72                                 |

**Table S11.** The computed values (eV) of the emission energies of the systems under study using the best proposed OT-SRSHs in this work. Also given in the table are the experimental data used as reference (Ref.). The corresponding statistical metrics are shown in boldface.

| Molecules | Ref. | BLYP ( $\alpha = 0.3, \beta = 0.7$ ) | PBE ( $\alpha = 0.3, \beta = 0.7$ ) | TPSS ( $\alpha = 0.4, \beta = 0.6$ ) |
|-----------|------|--------------------------------------|-------------------------------------|--------------------------------------|
| BP3T      | 2.17 | 2.02                                 | 2.04                                | 2.03                                 |
| BSBCz     | 2.58 | 2.28                                 | 2.28                                | 2.26                                 |
| CzPVSBF   | 2.63 | 2.20                                 | 2.20                                | 2.18                                 |
| BPBFCz1   | 2.56 | 2.37                                 | 2.37                                | 2.34                                 |
| BPBFCz2   | 2.90 | 2.50                                 | 2.52                                | 2.50                                 |

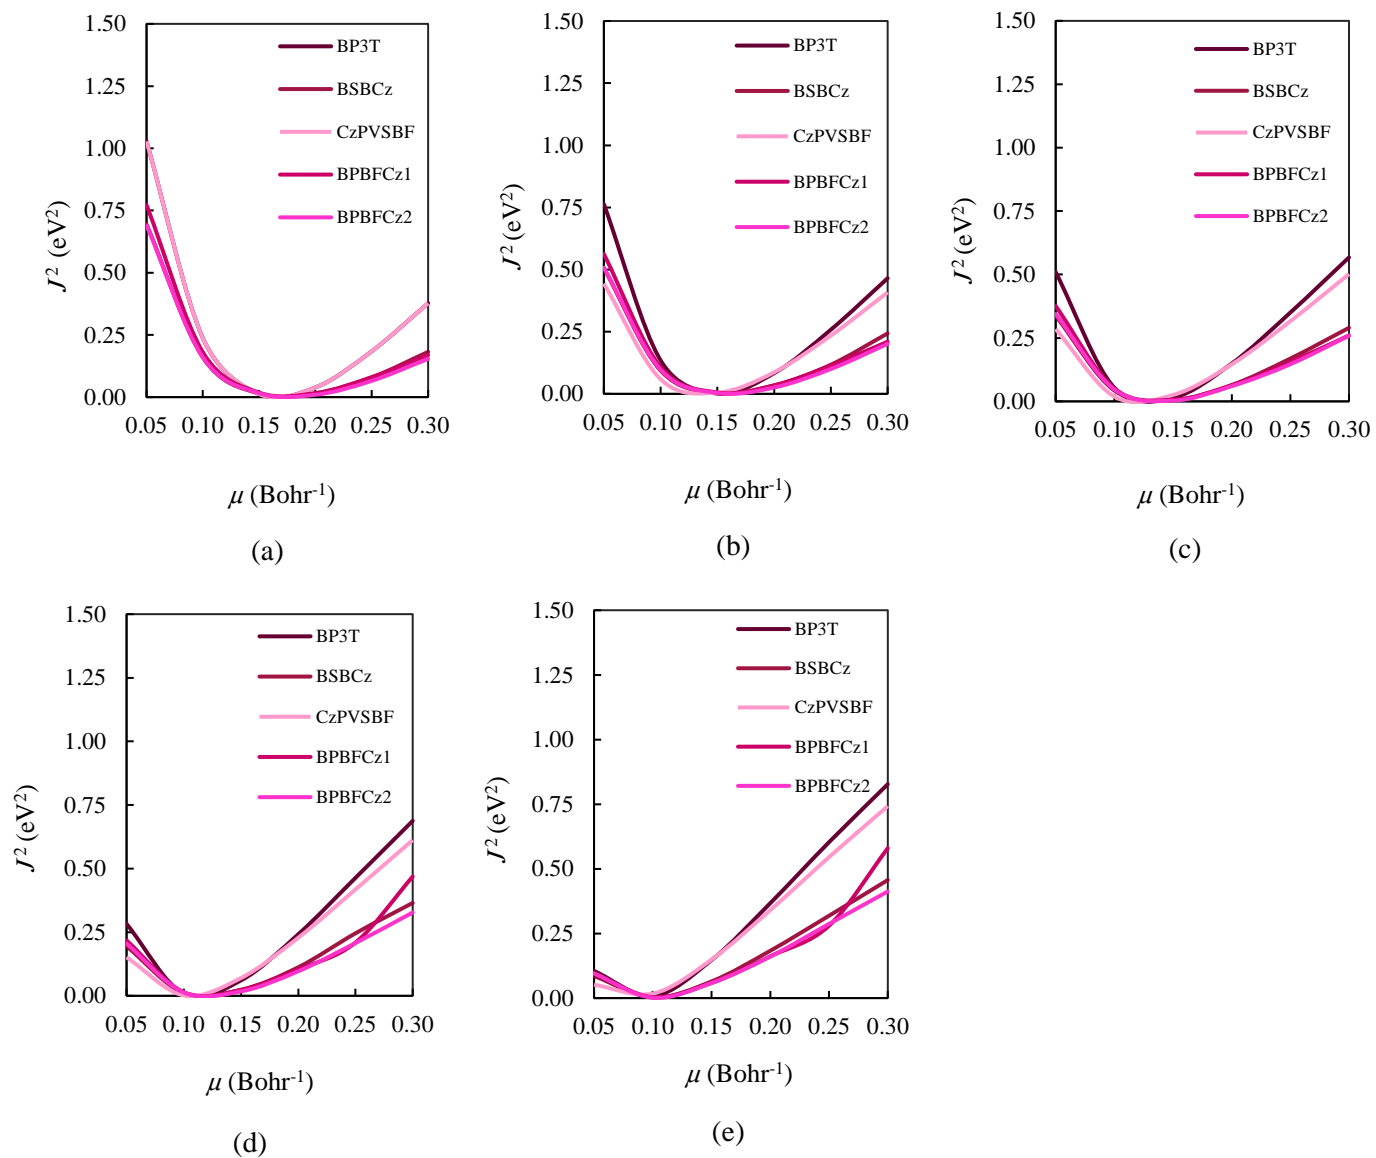

**Figure S1.** Plots of the target function  $J^2$  versus the range-separation parameter  $\mu$  for the systems under study. (a)  $\alpha = 0.0, \beta = 1.0$ , (b)  $\alpha = 0.1, \beta = 0.9$ , (c)  $\alpha = 0.2, \beta = 0.8$ , (d)  $\alpha = 0.3, \beta = 0.7$ , and (e)  $\alpha = 0.4, \beta = 0.6$ .

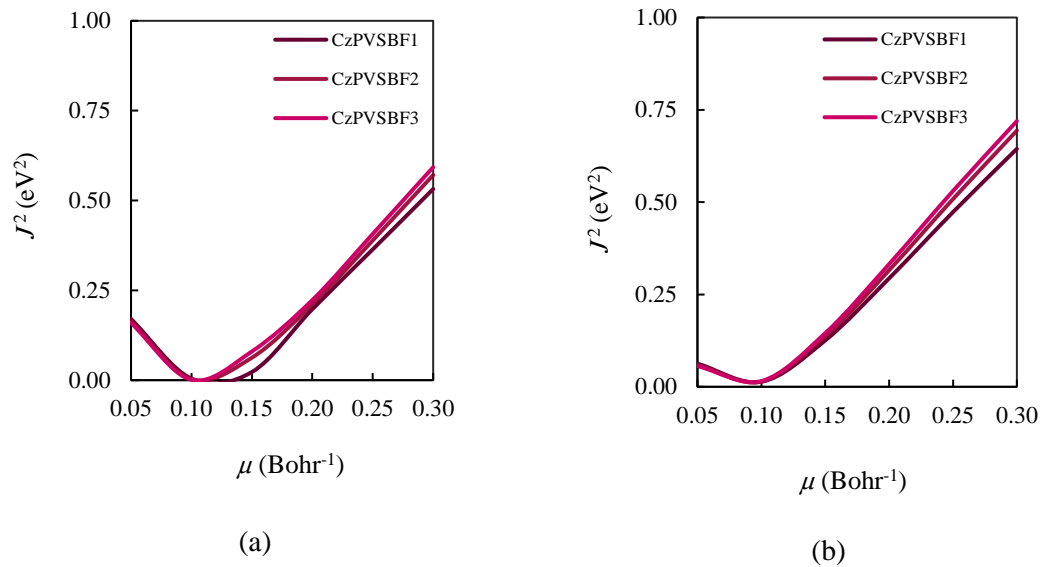

**Figure S2.** Plots of the target function  $J^2$  versus the range-separation parameter  $\mu$  for the theoretically designed chromophores in this work. (a)  $\alpha = 0.3, \beta = 0.7$  and (b)  $\alpha = 0.4, \beta = 0.6$ .
